# Supplementary material for: Defects of Vps15 in skeletal muscles lead to autophagic vacuolar myopathy and lysosomal disease
Source: PubMed Central journal article supplement (PMC3779449; doi:10.1002/emmm.201202057), 2013-04-30
Supplement: emmm0005-0870-SD2.pdf [file emmm0005-0870-SD2.pdf]

## **Supporting Information**

### **Defects of Vps15 in skeletal muscles lead to autophagic vacuolar myopathy and lysosomal disease**

Ivan Nemazanyy, Bert Blaauw, Cecilia Paolini, Catherine Caillaud, Feliciano Protasi,  
Amelie Mueller, Tassula Proikas-Cezanne, Ryan C. Russell, Kun-Liang Guan,  
Ichizo Nishino, Marco Sandri, Mario Pende, Ganna Panasyuk

#### **Table of contents**

Supporting Information Figures 1-14

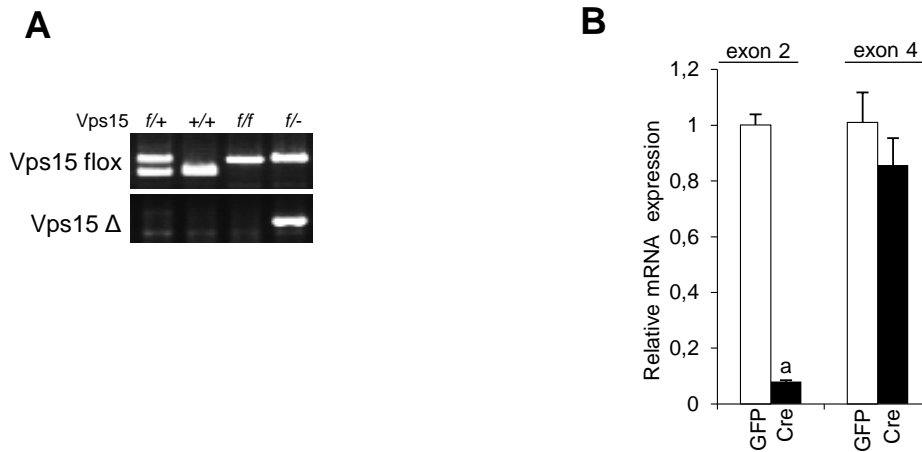

**Supporting Information Figure 1. Generation of whole body *Vps15<sup>f/f</sup>* knockout mice**  
**(A)** Representative tail snip genotyping of the pups derived of CMV-Cre<sup>+</sup>;Vps15<sup>f/f</sup> crosses to discriminate floxed and recombined *Vps15* allele using EF/ER and EF/LR primer pairs, accordingly. **(B)** RTqPCR analysis of *Vps15* expression in Vps15<sup>f/f</sup> MEFs cells transduced with GFP or Cre adenoviruses. Primer pair within exon 2 is used to assess the efficiency of Cre-mediated excision and primer pair within exon 4 to control the level of endogenously expressed truncated and full-length *Vps15*. Data are mean ±SEM (P<0.05 a: vs GFP).

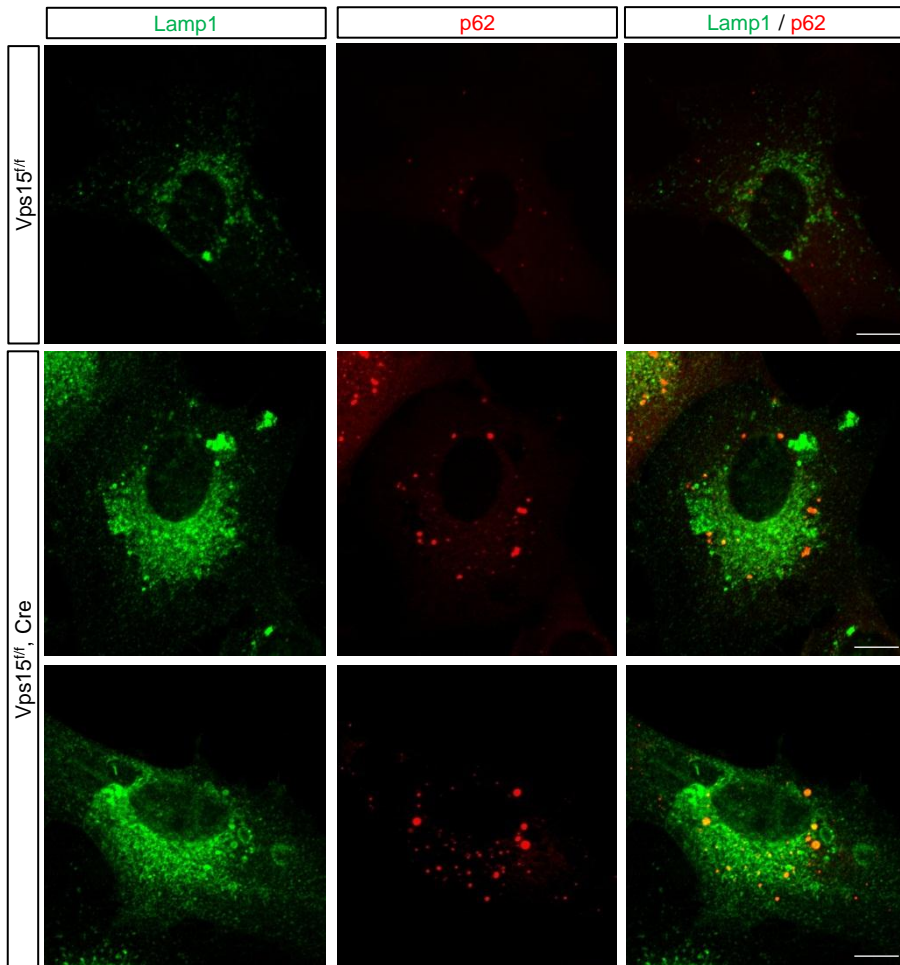

**Supporting Information Figure 2.**

Double-immunofluorescence staining of control and *Vps15*-depleted MEFs using anti-p62 and anti-LAMP1 antibodies. Scale bars: 10  $\mu$ m.

**A**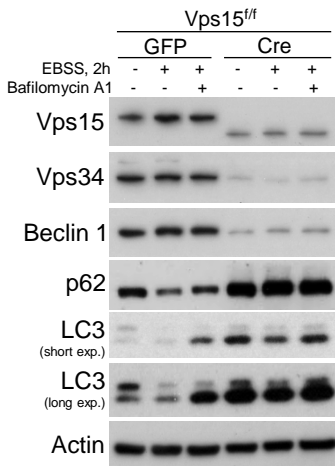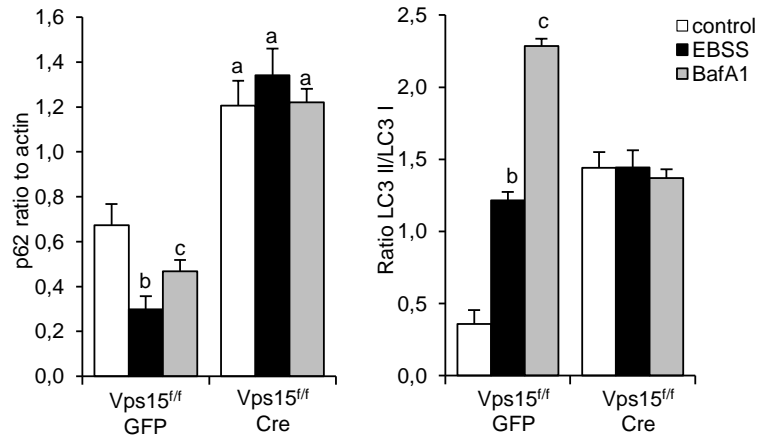**B**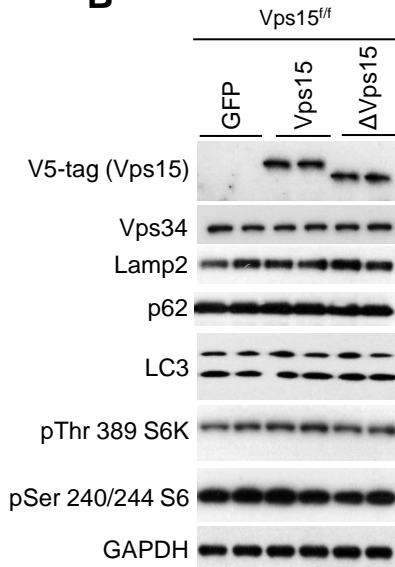**C**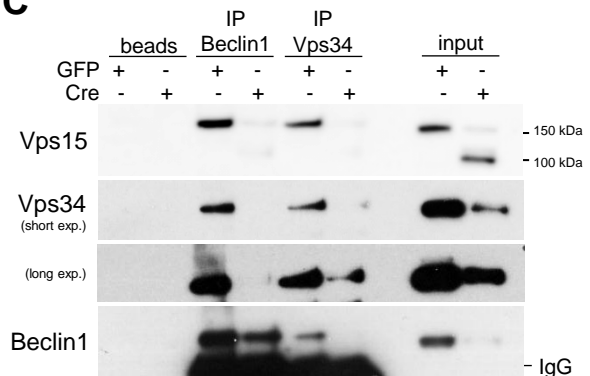**Supporting Information Figure 3.**

**(A)** Immunoblot analysis of total protein extracts of *Vps15*-depleted MEFs treated with EBSS for 2 hours with or without 200 nM bafilomycin A1 using indicated antibodies. The ratio of p62 to actin and ratio of two LC3 forms of the densitometric assay is presented as a graph. Data are mean  $\pm$ SEM ( $n=4$ ,  $P \leq 0.05$  a: vs GFP; b: vs control; c: vs EBSS).

**(B)** Expression studies of the control cells overexpressing truncated 100kDa or full-length *Vps15*. MEFs were transduced with indicated adenoviral vectors, collected 60 hours postinfection and total protein extracts were immunoblotted with indicated antibodies. **(C)** Truncated 100kDa *Vps15* does not interact with components of Class III PI3K complex. The presence of full-length *Vps15* and truncated 100 kDa *Vps15* in the immunoprecipitates of anti-*Vps34* and anti-*Beclin1* antibodies was analysed from control and *Vps15*-depleted cells by immunoblotting.

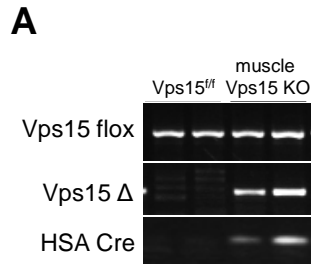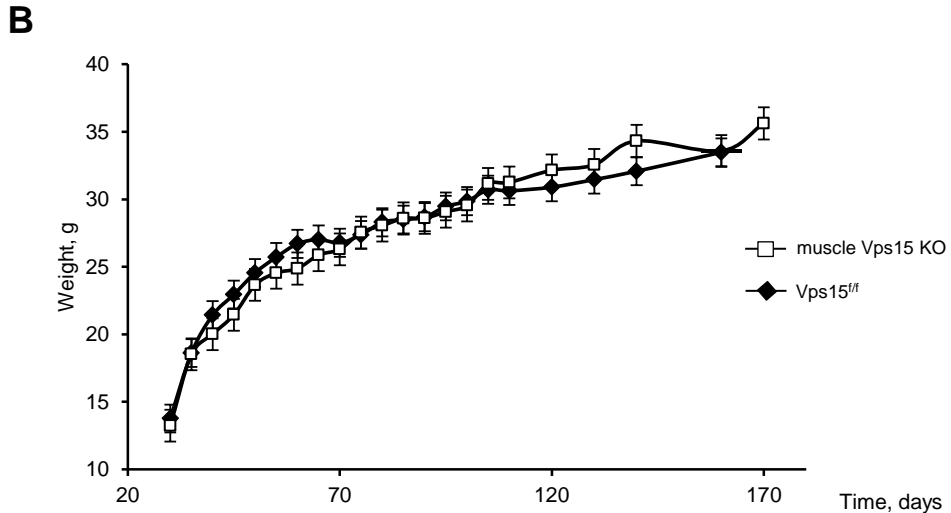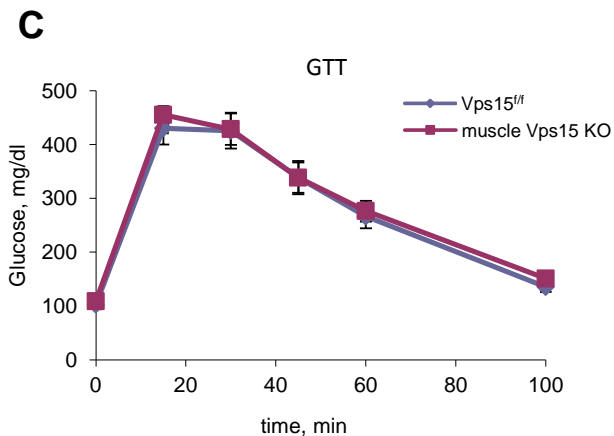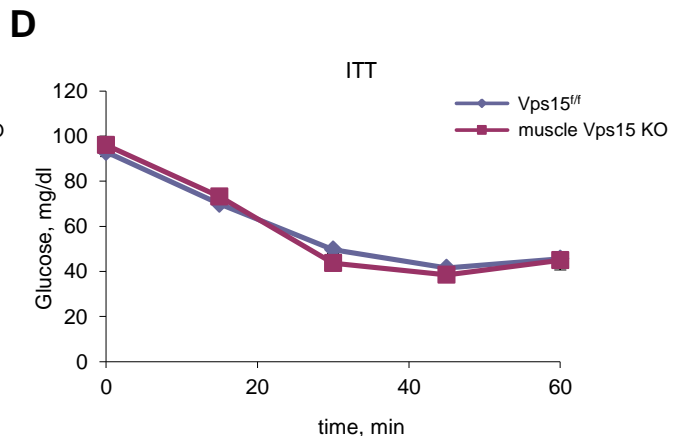

**Supporting Information Figure 4. Muscle specific deletion of *Vps15* does not affect whole body glucose metabolism**

**(A)** PCR analysis of genomic DNA from TA muscle of 2 month old muscle *Vps15* KO mice and control mice using EF/ER and EF/LR primer pairs, accordingly. **(B)** Growth curves of muscle *Vps15* KO mice and control mice. Data are mean  $\pm$ SEM.

Glucose tolerance test (GTT) **(C)** and insulin tolerance test (ITT) **(D)** of 2 month old muscle *Vps15* KO mice and control mice after intraperitoneal injection of glucose or insulin. Data are mean  $\pm$ SEM.

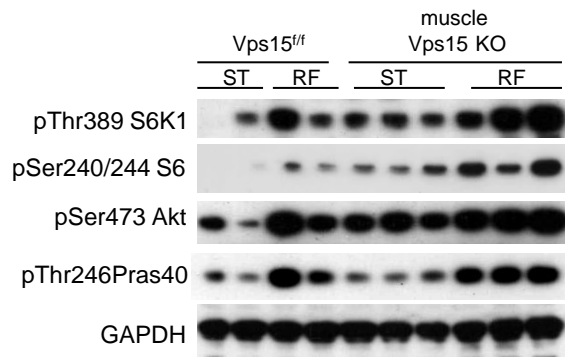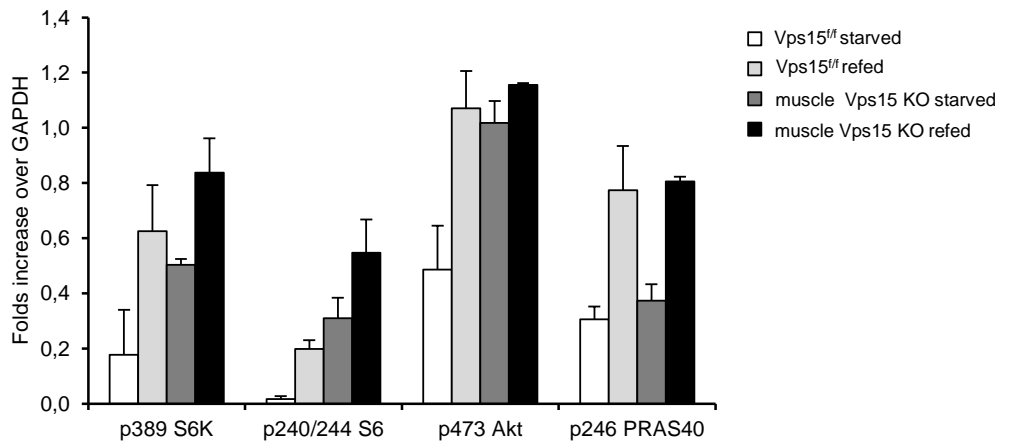

### Supporting Information Figure 5. mTOR signaling in Vps15 KO muscles

Immunoblot analysis with indicated antibodies of mTORC1 and mTORC2 activity in TA muscles of 3 month old muscle Vps15 KO and control mice under starved and refed conditions. Mice were starved for 16 hours and then refed for 3 hours. The ratio of phosphorylated proteins to GAPDH of the densitometric assay is presented. Data are mean  $\pm$ SEM.

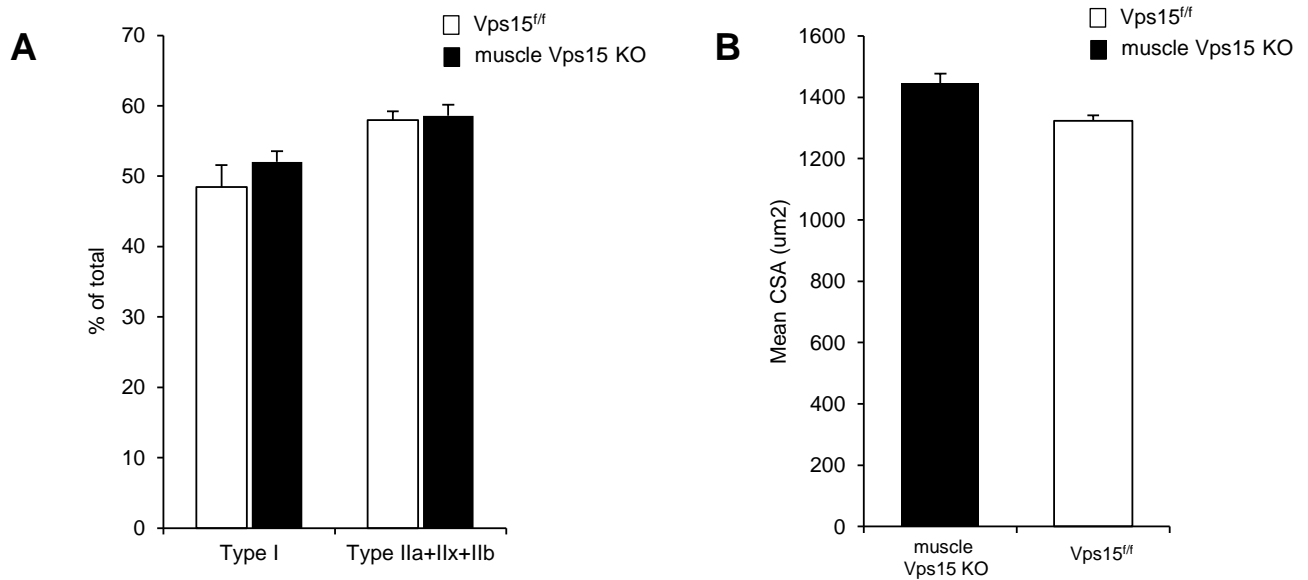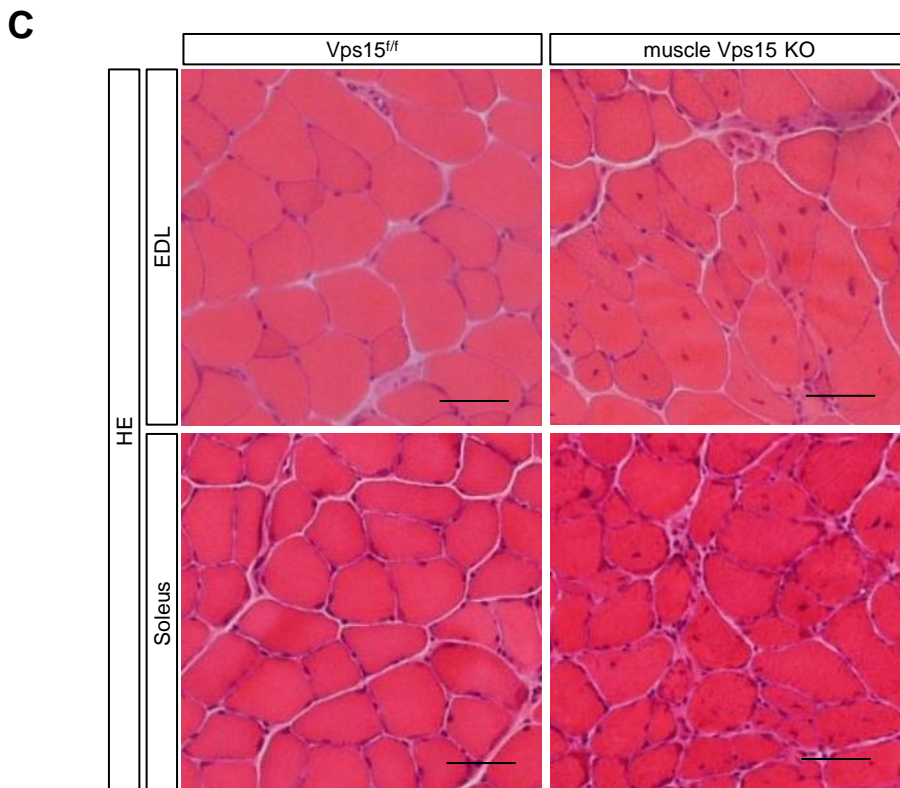

**Supporting Information Figure 6. Characterization of Vps15 KO Soleus and EDL muscles**

**(A)** Graph showing the percentage distribution of MHC isoforms I and II in Soleus muscle of 4 month old muscle Vps15 KO mice and matching controls. Data are means  $\pm$ SEM. **(B)** Analysis of the mean fibre CSA in Soleus muscle of 4 month old muscle Vps15 KO mice and matching control mice. Data are means  $\pm$ SEM. **(C)** Histological analysis of Soleus and EDL muscles of 2 month old Vps15 muscle KO mice and matching control mice by HE staining. Scale bars: 50  $\mu$ m.

**A**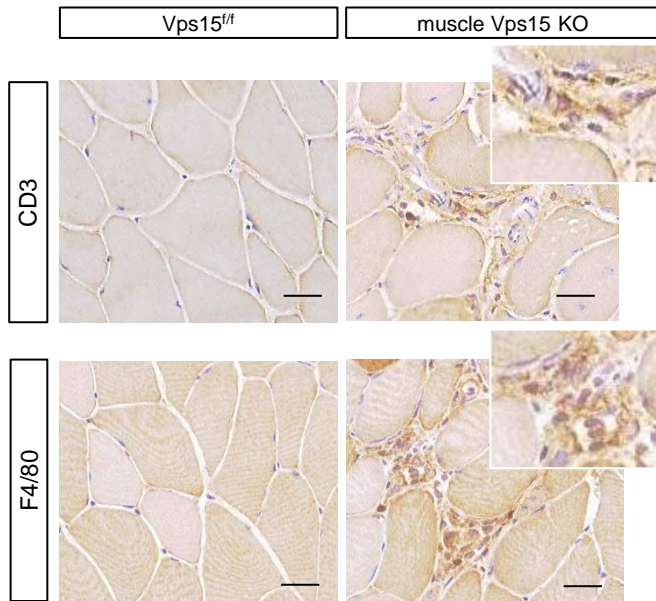**B**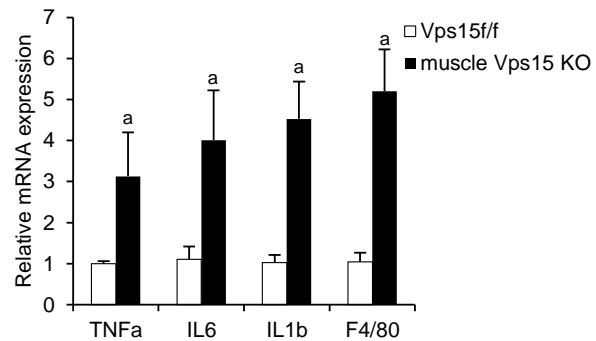

**Supporting Information Figure 7. Muscle damage is accompanied by inflammatory response in Vps15 KO muscles**

**(A)** Histological analysis of TA muscle of 4 month old Vps15 muscle KO mice and matching control mice by staining with markers of T-cells (CD3) and macrophages (F4/80). Scale bars: 40  $\mu$ m. **(B)** RTqPCR analyses of the transcript levels of pro-inflammatory cytokines and immune cell markers in TA muscle of 4 month old Vps15 muscle KO and matching control mice. Data are means  $\pm$ SEM (n=5,  $P \leq 0.05$  a: vs Vps15<sup>f/f</sup>).



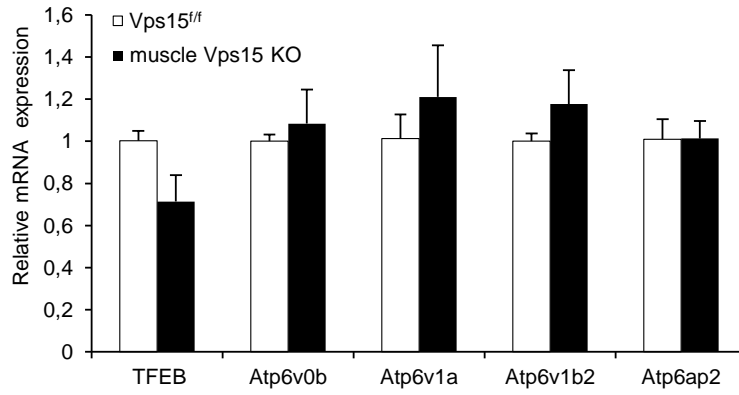

**Supporting Information Figure 8.**

Relative transcript levels of TFEB transcription factor and its targets in TA muscle of 4m old muscle Vps15 KO mice and matching control mice. Data are mean  $\pm$ SEM.

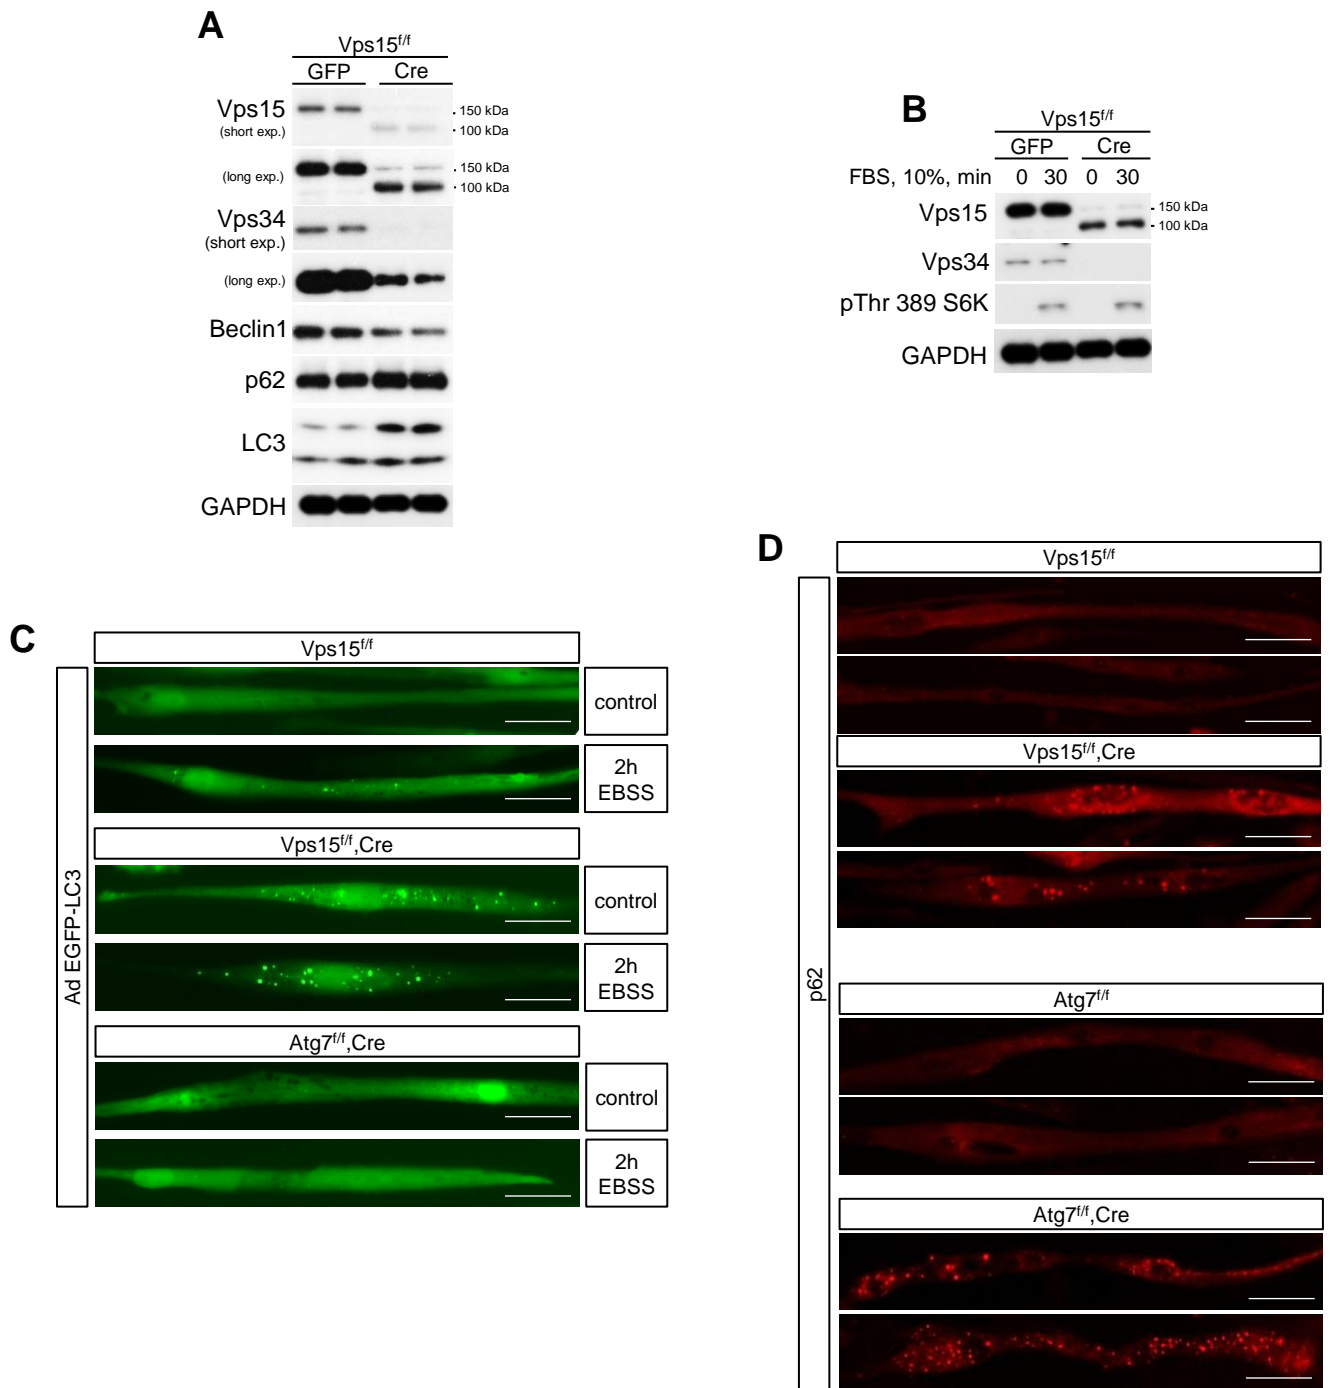

**Supporting Information Figure 9. Cell autonomous effects of *Vps15* and *Atg7* depletion in primary myotubes**

(A) Immunoblot analysis of *Vps15*-depleted and control myotubes with indicated antibodies. (B) Growth factor signaling in *Vps15*-depleted myotubes. Myotubes were nutrient starved and then stimulated with non-dialyzed FBS for 30 minutes. Total protein extracts were immunoblotted with indicated antibodies. (C) Control, *Vps15*-depleted and *Atg7*-depleted myotubes were infected with EGFP-LC3 expressing adenoviral vector, 24 hours postinfection cells were starved for 2 hours in EBSS, fixed and analysed by immunofluorescence. (D) Immunofluorescence staining of control, *Vps15*-depleted and *Atg7*-depleted myotubes using anti-p62 antibody. Scale bars: 30  $\mu$ m.

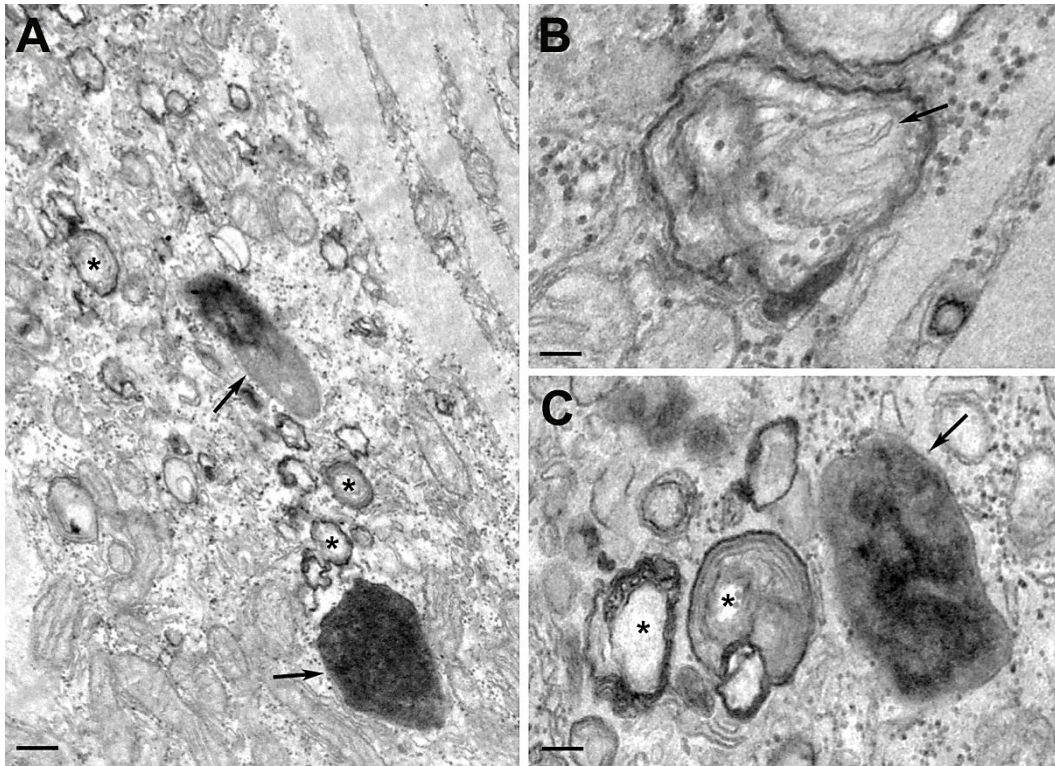

**Supporting Information Figure 10. Ultrastructural analysis of *Vps15*-deficient muscles**  
**(A)** Low magnification micrograph showing accumulation of numerous autophagic vacuoles along the fiber: lysosomes (arrows) and autophagosomes (asterisks). **(B)** Enlargement of autophagic vacuoles containing glycogen granules and enclosing a mitochondrion (arrow). **(C)** Enlargement of a large lysosomes, filled of glycogen and of two autophagic vacuoles (asterisks). Scale bars: A 0,2  $\mu\text{m}$ ; B and C 0,1  $\mu\text{m}$ .

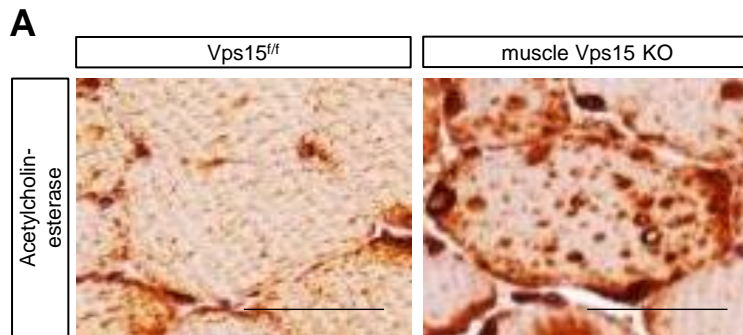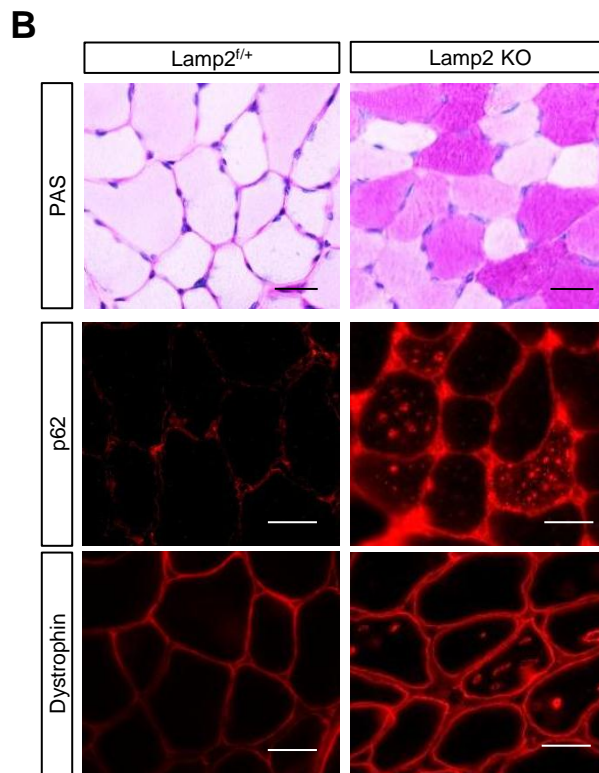

**Supporting Information Figure 11.**

**(A)** Sarcolemmal features in Vps15 KO muscles detected by Acetylcholinesterase immunostaining of TA muscles of 4 month old Vps15 muscle KO and control mice. Muscles were formalin fixed and embedded with paraffin. Scale bars: 40  $\mu$ m.

**(B)** Histological analysis of TA muscles of 4 month old Lamp2 knockout mice and matching control mice by Periodic acid Schiff (PAS) staining to detect glycogen, and immunostaining using anti-p62 and anti-Dystrophin antibodies. Scale bars: 40  $\mu$ m.

**A**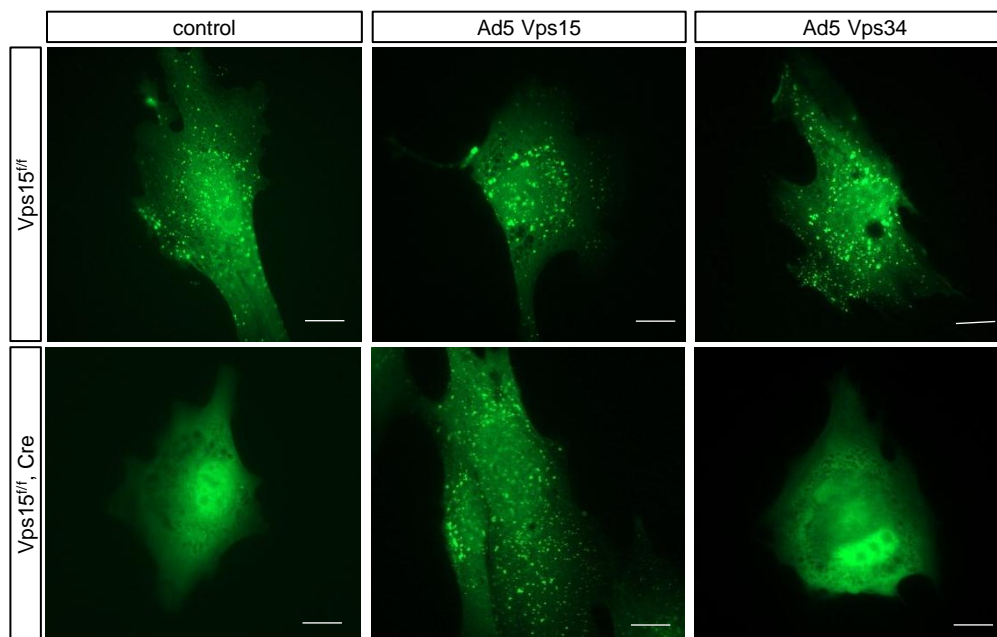**B**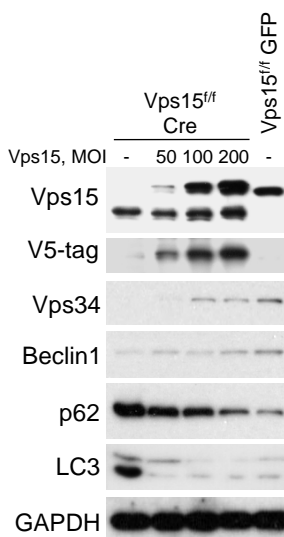

### Supporting Information Figure 12. *Vps15* overexpression in *Vps15*-depleted MEFs rescues PI3P levels and stimulates autophagy

**(A)** *Vps15*-depleted MEFs were infected with *Vps15* or *Vps34* adenoviruses, 36 hours postinfection cells were transfected with 2xFYVE-GFP expressing plasmid. PI3P positive compartments were visualised by confocal microscopy 24 hours posttransfection. Scale bars: 20  $\mu$ m.

**(B)** Overexpressed *Vps15* rescues the phenotype of *Vps15*-depleted cells in dose dependent manner. *Vps15*-depleted MEFs were transduced with increasing concentrations of adenoviral *Vps15* expressing vector, cells collected 60 hours postinfection and total protein extracts immunoblotted with indicated antibodies.

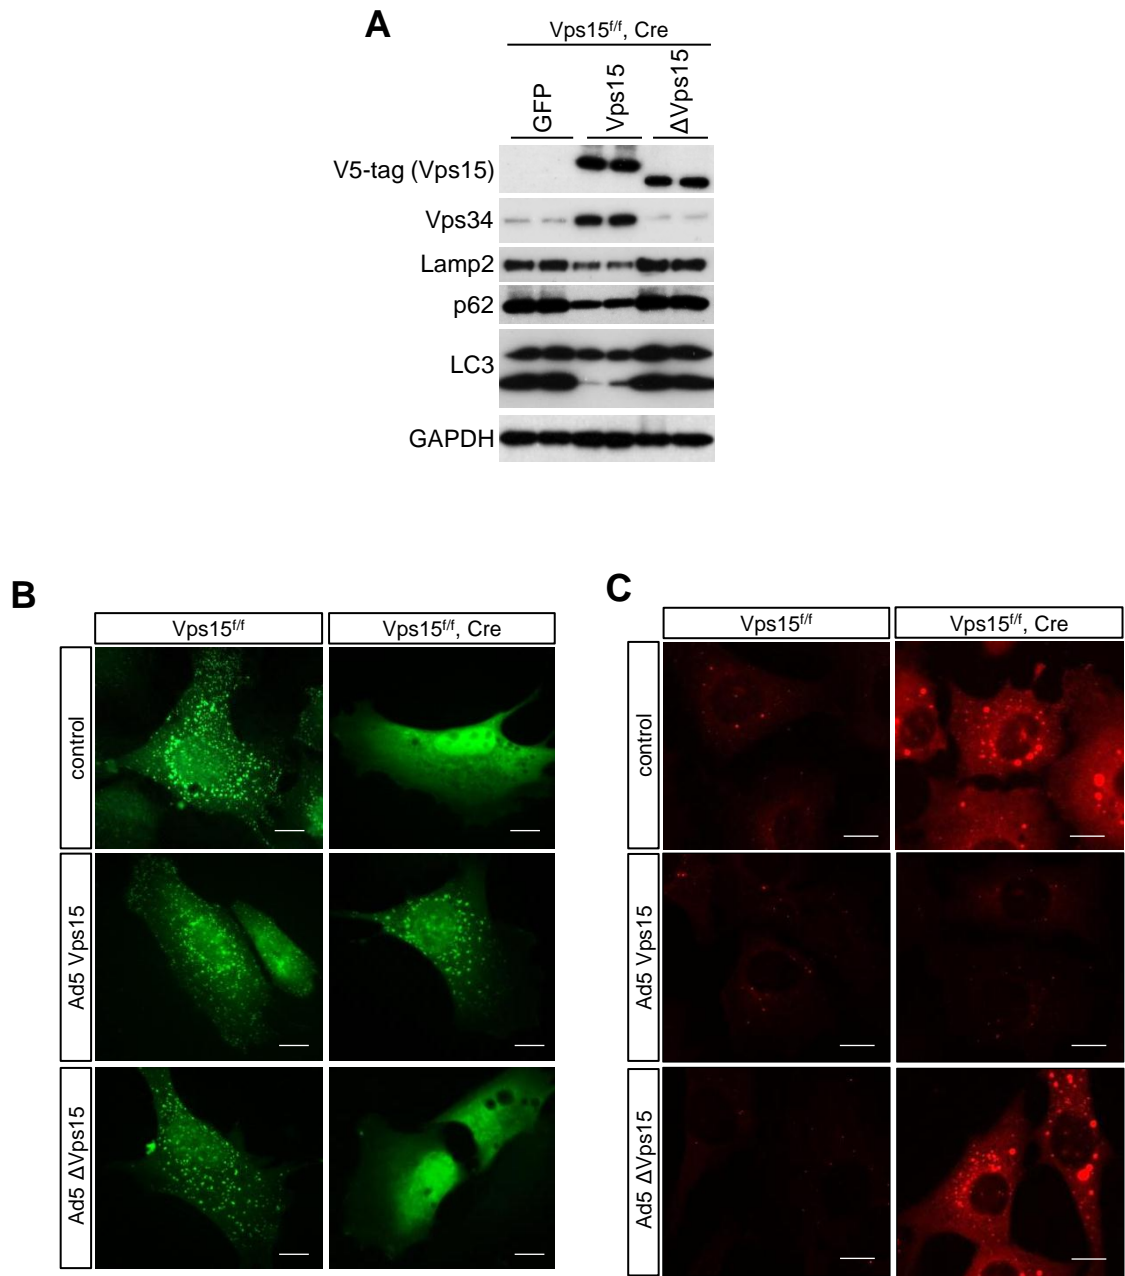

**Supporting Information Figure 13. Overexpression of truncated 100kDa Vps15 cannot substitute full-length protein**

**(A)** *Vps15*-depleted MEFs were transduced with indicated adenoviral vectors, collected 60 hours postinfection and total protein extracts were immunoblotted with indicated antibodies. **(B)** PI3P positive compartments were visualised in control and *Vps15*-depleted MEFs with and without *Vps15* overexpression. Cells were transfected with 2xFYVE-GFP expressing plasmid. 36 hours post transfection cells were fixed and PI3P positive compartments were revealed by confocal microscopy. **(C)** Immunofluorescence staining of control and *Vps15*-depleted MEFs with and without *Vps15* overexpression using anti-p62 antibodies. Scale bars: 20 μm.

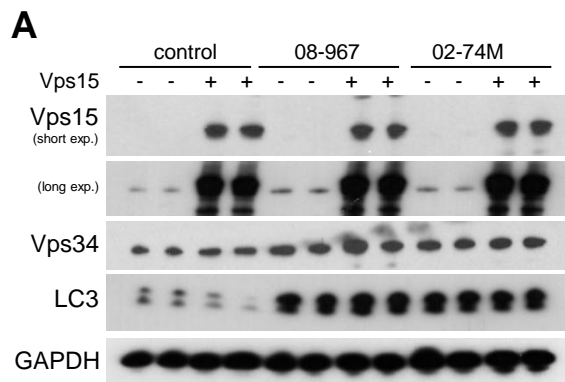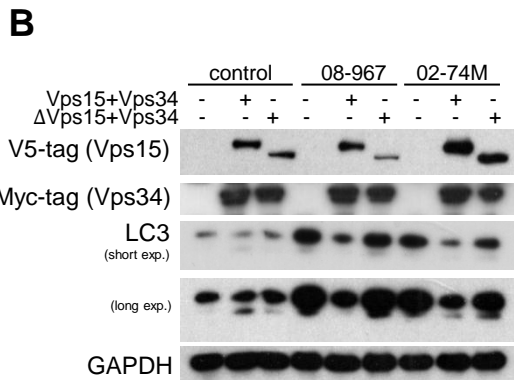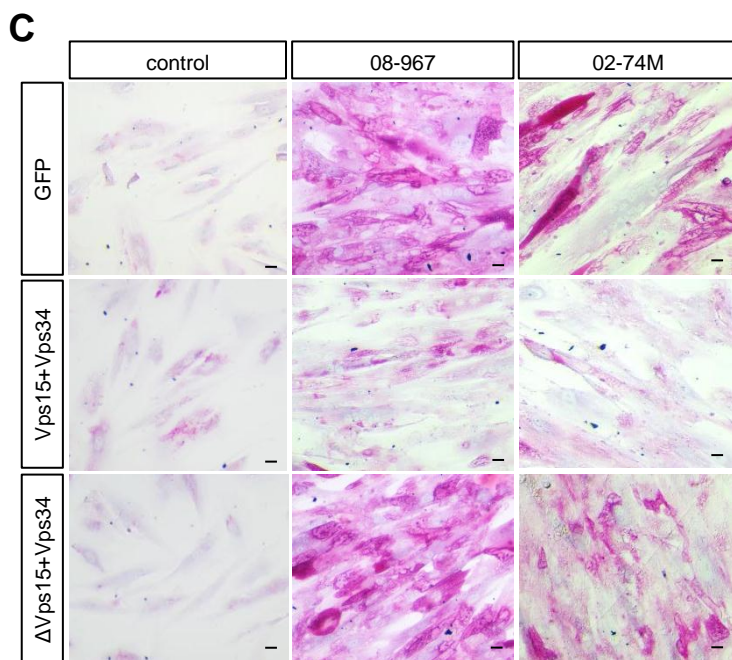

### Supporting Information Figure 14.

**(A)** Overexpression of Vps15 alone in primary myotube cultures from Danon disease patients does not upregulate autophagy. Human myoblasts derived from Danon disease patients were differentiated to myotubes and transduced 2 days postdifferentiation with adenoviral vector overexpressing full-length Vps15. Cells were collected 3 days postinfection and total protein extracts analysed by immunoblotting with indicated antibodies.

**(B)** Overexpression of truncated Vps15 in primary myotube cultures from Danon disease patients does not affect autophagy. Human myoblasts derived from Danon disease patients were differentiated to myotubes and transduced 2 days postdifferentiation with Vps15 and Vps34 adenoviral vectors. Cells were collected 3 days postinfection and total protein extracts were analysed by immunoblotting with indicated antibodies. **(C)** PAS staining of the glycogen in human myotubes derived from Danon disease patients transduced with GFP, Vps15/Vps34 or truncated 100kDa Vps15/Vps34 adenoviral vectors, analysed 3 days postinfection. Scale bars: 20  $\mu$ m.
